# Supplementary material
Source: PubMed Central journal article supplement (PMC2747346)
Supplement: NIHMS91589-supplement-1_si_001.pdf [file NIHMS91589-supplement-1_si_001.pdf]

## Supporting Information

- S1. MALDI-TOF spectrograph of unreacted AB1-C assembly
- S2. MALDI-TOF spectrograph of unreacted AB1-MM assembly
- S3. MALDI-TOF spectrograph of photocleavage reaction with  $\text{Rh}(\text{bpy})_2(\text{chrysi})^{3+}$  and AB1-MM assembly
- S4. MALDI-TOF spectrograph of unreacted B1-C assembly
- S5. MALDI-TOF spectrograph of photocleavage reaction with  $\text{Rh}(\text{bpy})_2(\text{chrysi})^{3+}$  and B1-C assembly

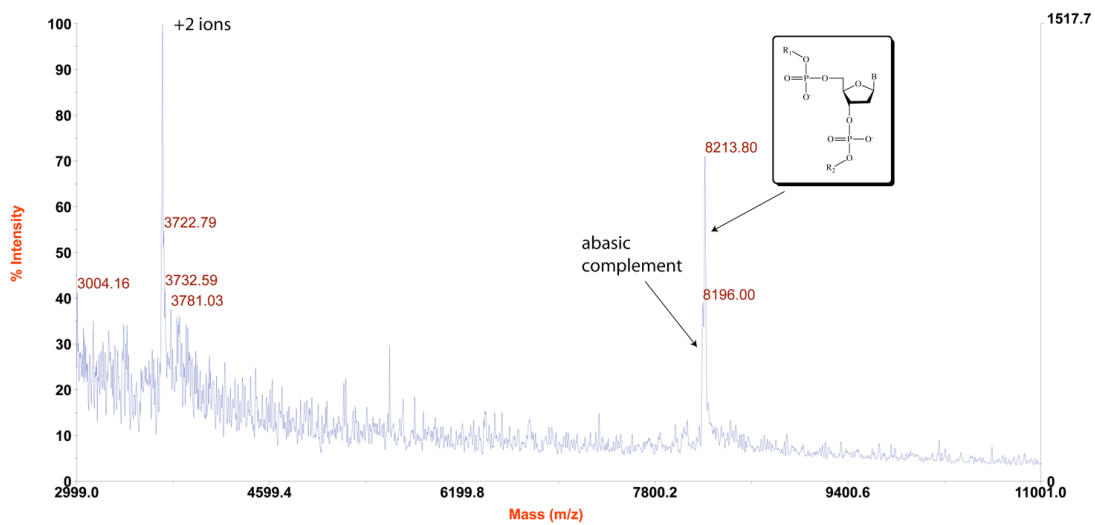

**S1.** MALDI-TOF mass spectrograph of unreacted duplex AB1-C, 5'- GAC CAG CTT ATC ACC CCT AGA TAA GCG -3' in which the underlined, italicized cytosine is the unpaired complement of an abasic site. R<sub>1</sub> = GAC CAG CTT ATC A; R<sub>2</sub> = CCC TAG ATA AGC G; B = cytosine.

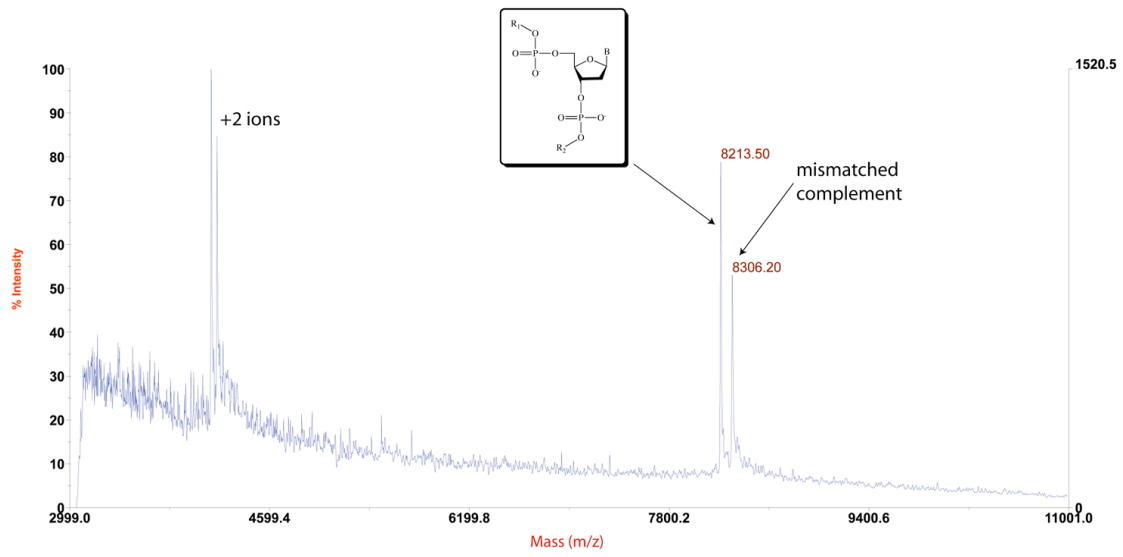

**S2.** MALDI-TOF mass spectrograph of unreacted duplex AB1-MM. R<sub>1</sub> = GAC CAG CTT ATC A; R<sub>2</sub> = CCC TAG ATA AGC G; B = cytosine.

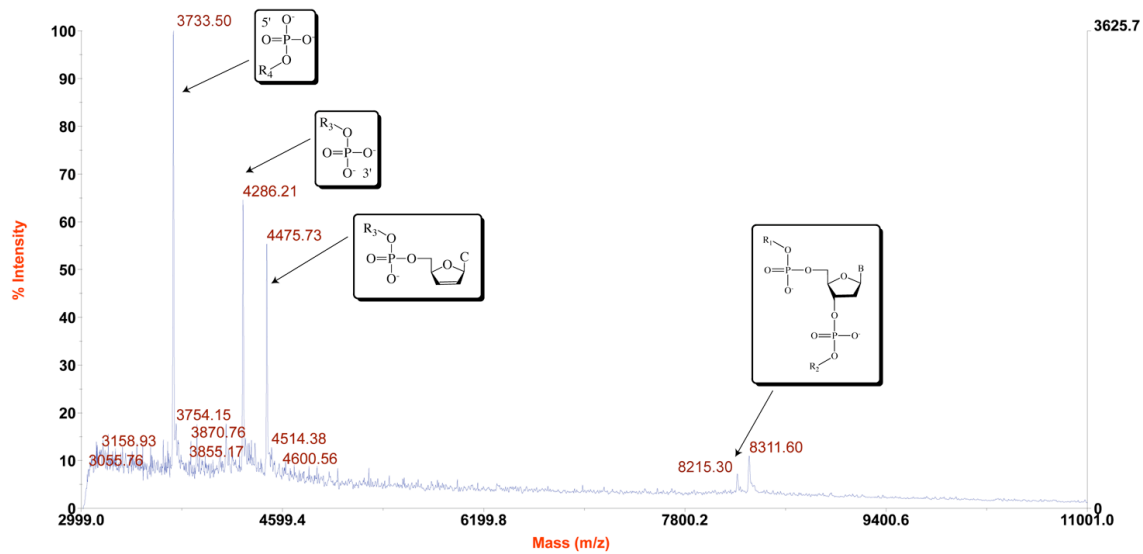

**S3.** MALDI-TOF mass spectrograph of photocleavage products of duplex AB1-MM, 5'-GAC CAG CTT ATC *ACC* CCT AGA TAA GCG -3' in which the underlined, italicized cytosine is the complement of a mismatched C. The rightmost peaks correspond to the full, uncleaved parent strands. Assigned scission products can be viewed on the left-hand side of the plot and correspond to 5'-PO<sub>4</sub>-CCT AGA TAA GCG-3', 5'-GAC CAG CCT ATC *AC*-PO<sub>4</sub>-3', and 5'-GAC CAG CCT ATC *AC*-dehydroC-3'. R<sub>1</sub> = GAC CAG CTT ATC A; R<sub>2</sub> = CCC TAG ATA AGC G; R<sub>3</sub> = GAC CAG CCT ATC *AC*; R<sub>4</sub> = CCT AGA TAA GCG; B = cytosine.

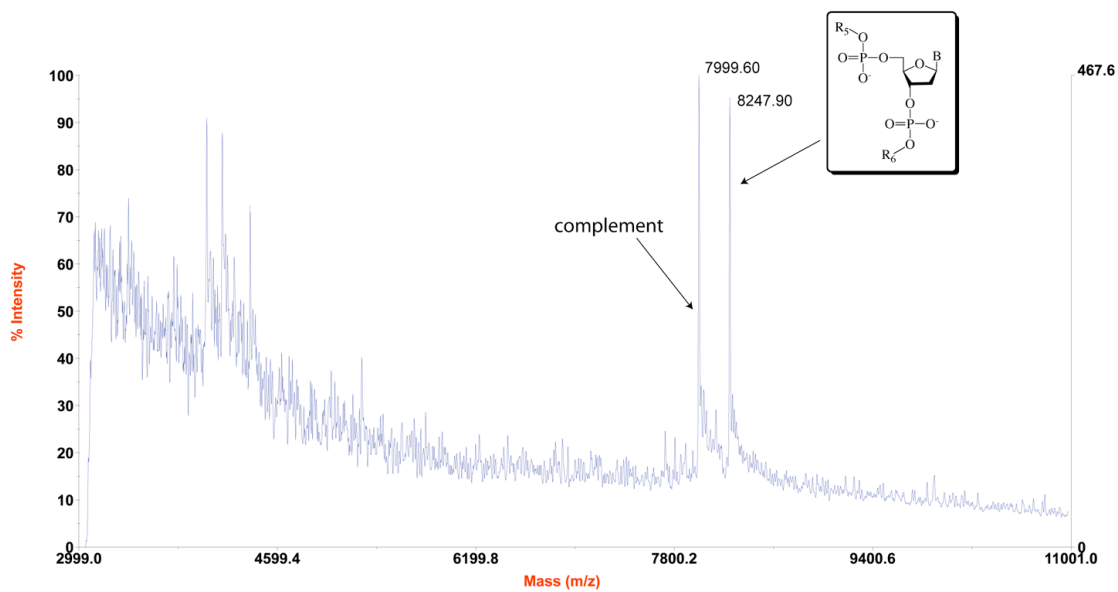

**S4.** MALDI-TOF mass spectrograph of unreacted duplex B2-A. R<sub>5</sub> = GAC CAG CTT ATC AT; R<sub>6</sub> = CCT AGA TAA GCG; B = Adenine.

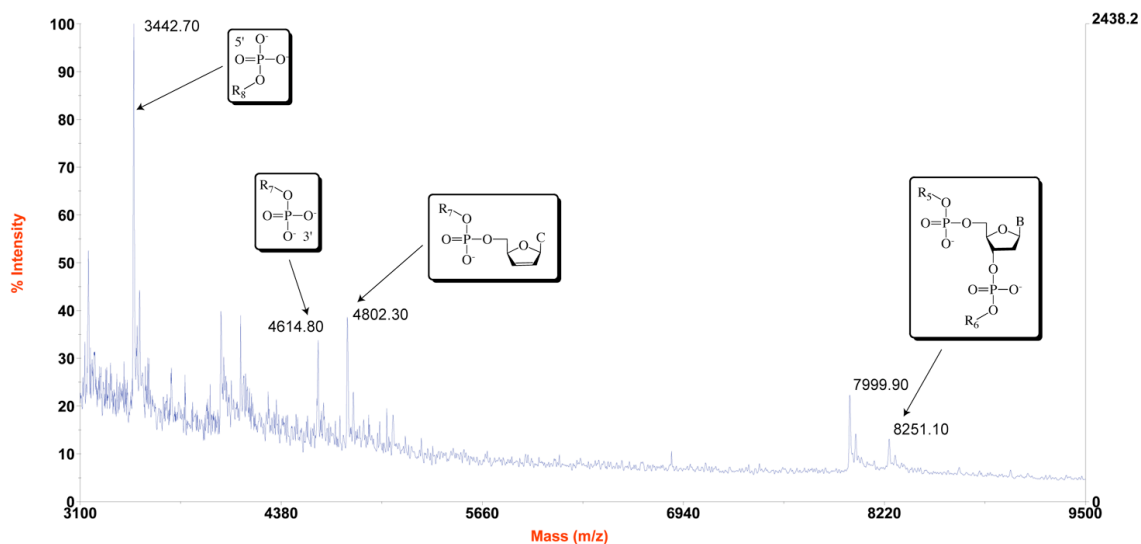

**S5.** MALDI-TOF mass spectrograph of photocleavage products of duplex B2-A, 5'-GAC CAG CTT ATC AT<sub>A</sub> CCT AGA TAA GCG -3' in which the underlined, italicized adenine is the unpaired, bulged base. The rightmost peaks correspond to the full, uncleaved parent strands. Assigned scission products can be viewed on the left-hand side of the plot and correspond to 5'-PO<sub>4</sub>-CTA GAT AAG CG-3', 5'-GAC CAG CCT ATC AT<sub>A</sub>-PO<sub>4</sub>-3', and 5'-GAC CAG CCT ATC AT<sub>A</sub>-dehydroC-3'. R<sub>5</sub> = GAC CAG CTT ATC AT; R<sub>6</sub> = CCT AGA TAA GCG; R<sub>7</sub> = GAC CAG CCT ATC AT<sub>A</sub>; R<sub>8</sub> = CTA GAT AAG CG; B = Adenine
